# Supplementary material for: Interlayer spacing expansion for V2O5 towards ultra-stable zinc anode-based flexible electrochromic displays in Zn2+/Li+-PC organic electrolyte
Source: Royal Society of Chemistry journal article supplement (doi:10.1039/d4cc04974h), 2024-01-01
Supplement: d4cc04974h1.pdf [file d4cc04974h1.pdf]

Electronic Supplementary Material (ESI) for Chemical Communications.

**Interlayer spacing expansion for  $V_2O_5$  towards ultra-stable zinc anode-based flexible electrochromic displays in**

**$Zn^{2+}/Li^+$ -PC organic electrolyte**

## Experimental section

### Materials

All chemicals were of analytical grade and were used without further purification. Zinc foil (Zn, 99.9%), zinc perchlorate hexahydrate ( $\text{Zn}(\text{ClO}_4)_2 \cdot 6\text{H}_2\text{O}$ , reagent grade), propylene carbonate (PC), vanadate oxide ( $\text{V}_2\text{O}_5$ , 99%) and polymethyl methacrylate (PMMA,  $M_w \sim 35,000$ ) were purchased from Macklin Biochemical Technology Co. Ltd. Lithium perchlorate ( $\text{LiClO}_4$ ,  $\geq 99.0\%$ ) were purchased from Sinopharm Chemical Reagent Co. Ltd. ITO glasses were purchased from Zhuhai Kaivo Glass Co. Ltd. Flexible PET-ITO conductive films were purchased from South China Science & Technology Co. Ltd. 3 M transparent double-sided tapes (VHB, 3 m  $\times$  10 mm  $\times$  1.0 mm) were purchased from 3 M China Co. Ltd.

### Synthesis of PEDOT@ $\text{V}_2\text{O}_5$ nanofibers

First, add 7 g of commercial  $\text{V}_2\text{O}_5$  to 200 mL of deionized water and stir for 30 minutes. Next, add x mL of EDOT to the liquid and stir for 5 days to turn it from yellow to dark green. Then, centrifuge the dark green solution twice with deionized water and ethanol, respectively, and dry overnight at 70 °C to obtain PEDOT@ $\text{V}_2\text{O}_5$  powders. Repeat the above steps for commercial  $\text{V}_2\text{O}_5$  without adding EDOT to obtain bare  $\text{V}_2\text{O}_5$  as control samples. The amount of EDOT were varied as 1 mL, 3 mL and 5 mL, respectively, and the resulted samples were marked as 1-PEDOT@ $\text{V}_2\text{O}_5$ , 3-PEDOT@ $\text{V}_2\text{O}_5$  and 5-PEDOT@ $\text{V}_2\text{O}_5$ .

### Fabrication of PEDOT@ $\text{V}_2\text{O}_5$ electrodes

Add 15 mg of dried powder into 40 ml of deionized water and sonicate for at least 1 hour to disperse evenly. Treat the ITO glass with a plasma cleaning machine for 60 seconds, spray all the suspension onto the ITO glass with an effective area of 4 cm  $\times$  5 cm on a 150 °C heating plate, and then continue annealing at this temperature for 20 hours.

### Assembly of Zn-PEDOT@ $\text{V}_2\text{O}_5$ flexible electrochromic displays

The PMMA-based gel electrolyte was prepared by gradually adding 10 g of PMMA powder into 40 mL of the hybrid PC solution comprising 0.1 M  $\text{Zn}(\text{ClO}_4)_2$  and 0.8 M  $\text{LiClO}_4$ . Spray a pineapple-shaped PEDOT@ $\text{V}_2\text{O}_5$  film on a 5 cm  $\times$  8 cm PET-ITO conductive film to obtain the cathode, paste the zinc foil frame onto another PET-ITO conductive film to obtain the anode, and the PMMA-based gel electrolyte is used as an electrolyte to assemble a flexible electrochromic display as shown in Fig. 5a (Electrolyte not marked).

### Characterization

The crystal structures, morphology and chemical structures of the samples were examined by X-ray diffraction (XRD, Rigaku D/Max 2200/PC diffractometer with a graphite monochromator and Cu K $\alpha$  radiation

( $\lambda=0.15418$  nm)), X-ray photoelectron spectroscopy (XPS) (PHI 5000 VersaProbe III), field emission scanning electron microscope (FESEM, FEI Quanta 250 FEG) and high-resolution transmission electron microscope (HRTEM, JEM-F200(HRP)). The interlayer spacing was calculated according to equation S1.

$$2d \sin\theta = n \lambda \quad (\text{S1})$$

where  $d$  is the crystal plane spacing,  $\theta$  is the angle between the incident X-rays and the corresponding crystal plane,  $\lambda$  is the wavelength of the X-rays, and  $n$  is the number of diffraction stages.

### Electrochemical and optical measurements

All electrochemical measurements were carried out using an electrochemical workstation (CHI-760E, CH Instruments, Shanghai, China) in a two-electrode configuration, using the electrochromic electrode as the working electrode, a zinc foil as the counter electrode and reference electrode. All optical measurements were performed using a UV–visible–NIR Spectrophotometer (UH5700). In situ optical transmittance as a function of the applied potential was obtained in a quartz cuvette recorded by the UV–visible–NIR Spectrophotometer. Add electrolyte to a quartz cuvette and immerse an ITO glass in it as a baseline to measure the performance of the electrode. However, in the dissolution experiment shown in **Fig. 3**, the transmittance was measured using air as the baseline. In this work, two types of solutions were used as electrolytes: the hybrid organic solution comprised of 0.1 M  $\text{Zn}(\text{ClO}_4)_2$  and 0.8 M  $\text{LiClO}_4$  (marked as  $\text{Zn}^{2+}/\text{Li}^+$ -PC), and hybrid aqueous solution comprised of 0.1 M  $\text{Zn}(\text{ClO}_4)_2$  and 0.8 M  $\text{LiClO}_4$  (marked as  $\text{Zn}^{2+}/\text{Li}^+$ - $\text{H}_2\text{O}$ ).

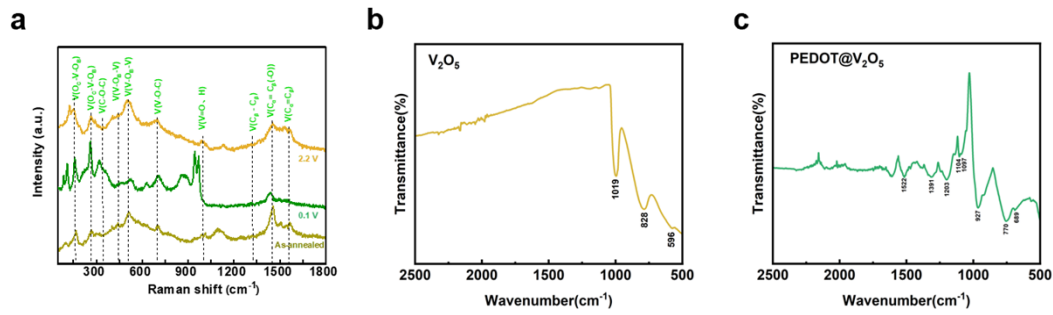

**Fig. S1 a** Raman spectra of PEDOT@V<sub>2</sub>O<sub>5</sub> at different states. As-prepared, discharged to 0.1 V and charged to 2.2 V. **b** FTIR spectra of commercial

V<sub>2</sub>O<sub>5</sub>. **c** FTIR spectra of PEDOT@V<sub>2</sub>O<sub>5</sub>.

The chemical structure of PEDOT@V<sub>2</sub>O<sub>5</sub> was evaluated by Raman spectroscopy (Fig. S1a). The peak at 101 cm<sup>-1</sup> is attributed to the external Ty mode. The peak at 165 cm<sup>-1</sup> arises from the bending vibrations of the skeleton. Peaks at 178 and 264 cm<sup>-1</sup> correspond to bending vibrations of the OC-V-OB bond. Peaks at 305, 406, 531, and 704 cm<sup>-1</sup> are related to C-O-C bond bending, V-OB-V bond bending, V-OB-V bond stretching, and V-O-C bond stretching vibrations, respectively. The V=O bond at 986 cm<sup>-1</sup> is crucial for understanding the layered structure of the V<sub>2</sub>O<sub>5</sub> electrode<sup>1</sup>, which connects with oxygen atoms and contributes to electrode stability.

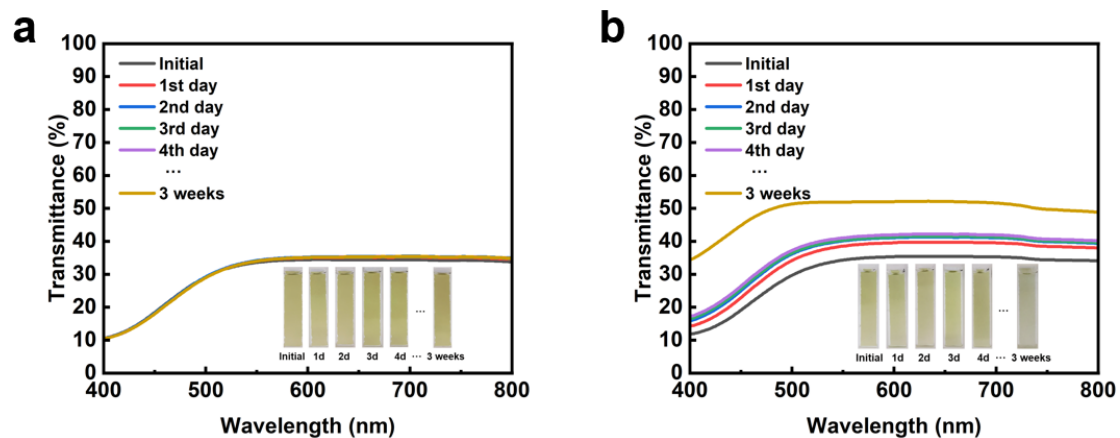

**Fig S2.** a, b T% transmittance spectra and corresponding digital photos of PEDOT@V<sub>2</sub>O<sub>5</sub> electrode soaked in a Zn<sup>2+</sup>/Li<sup>+</sup>-PC and b Zn<sup>2+</sup>/Li<sup>+</sup>-H<sub>2</sub>O for 3 weeks, respectively.

The PEDOT@V<sub>2</sub>O<sub>5</sub> film shows negligible dissolution and transmittance variation after soaking in Zn<sup>2+</sup>/Li<sup>+</sup>-PC for 3 weeks. However, the same electrode is obviously dissolved into Zn<sup>2+</sup>/Li<sup>+</sup>-H<sub>2</sub>O with gradually increased transmittance, forming soluble vanadium ion species (V<sup>3+</sup>, VO<sup>+</sup>, VO<sup>2+</sup>, H<sub>2</sub>VO<sup>4-</sup> and HV<sub>2</sub>O<sub>5</sub><sup>-</sup>) in aqueous electrolytes<sup>2</sup>.

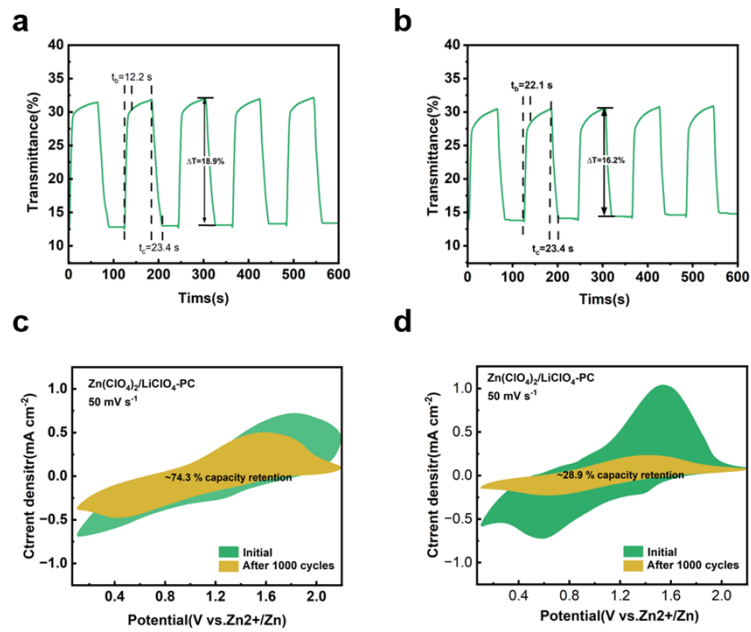

**Fig. S3** Electrochemical performance of PEDOT@V<sub>2</sub>O<sub>5</sub> electrode in Zn<sup>2+</sup>/Li<sup>+</sup>-PC. **a** Dynamic T% test of the 1-PEDOT@V<sub>2</sub>O<sub>5</sub> electrode at 400 nm in the 0.1-2.2 V window. **b** Dynamic T% test of the 5-PEDOT@V<sub>2</sub>O<sub>5</sub> electrode at 400 nm in the 0.1-2.2 V window **c** CV cycling stability of 1-PEDOT@V<sub>2</sub>O<sub>5</sub>. **d** CV cycling stability of 5-PEDOT@V<sub>2</sub>O<sub>5</sub>.

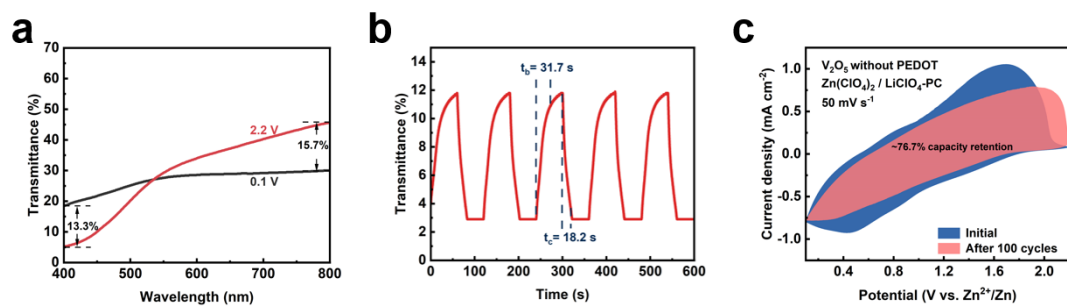

**Fig. S4** Electrochemical performance of  $V_2O_5$  stirred without EDOT electrode in  $Zn^{2+}/Li^+$ -PC. **a** T% spectra at 0.1 and 2.2 V. **b** Dynamic T% test of the  $V_2O_5$  electrode at 400 nm in the 0.1-2.2 V window. **c** CV cycling stability.

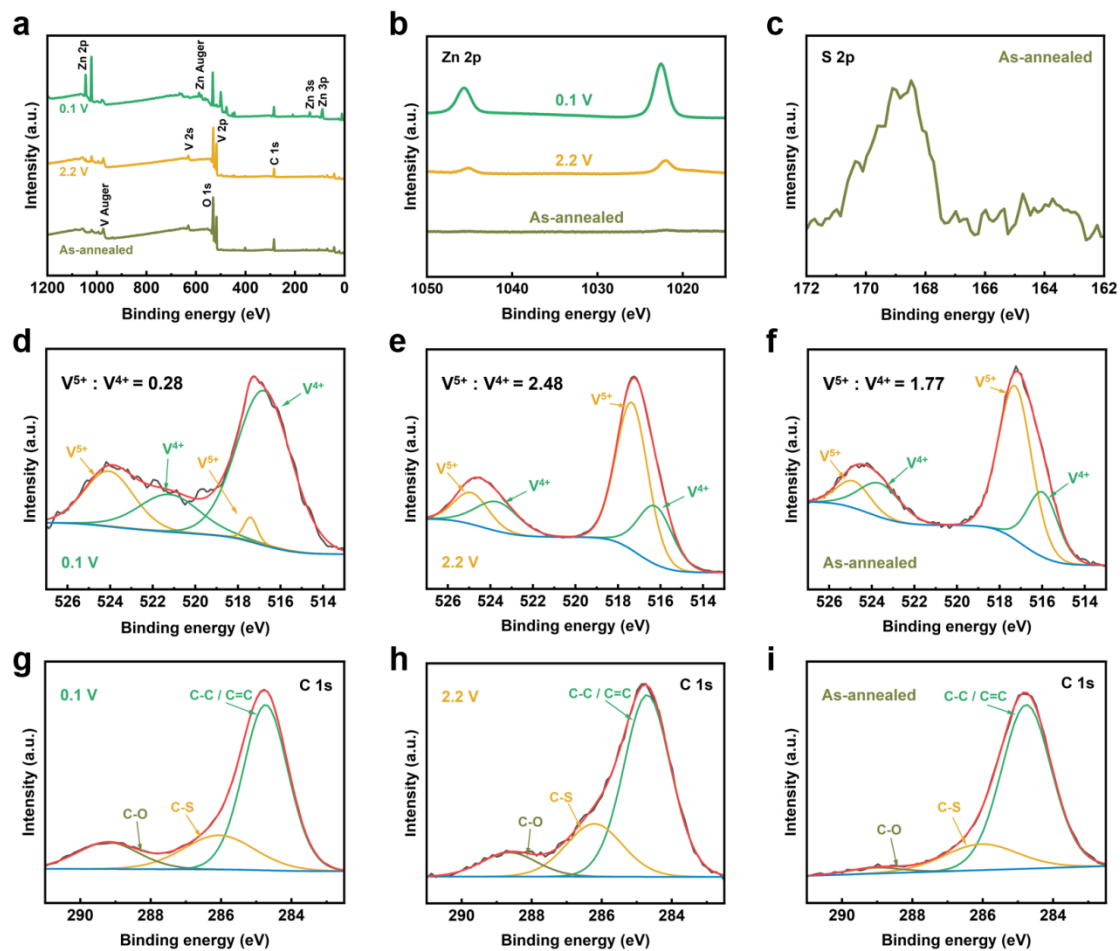

Fig. S5 The XPS survey spectra of PEDOT@V<sub>2</sub>O<sub>5</sub> electrode at different states. a full survey. b Zn 2p. c S 2p. d-f V 2p. g-i C 1s.



**Table S1.** The atomic ratio of V<sup>4+</sup> and V<sup>5+</sup> in reduced (0.1 V), oxidized (2.2 V), and as-annealed PEDOT@V<sub>2</sub>O<sub>5</sub> films.

| Sample conditions | The atomic percentage of V in different valence states |                 | V <sup>5+</sup> /V <sup>4+</sup> |
|-------------------|--------------------------------------------------------|-----------------|----------------------------------|
|                   | V <sup>4+</sup>                                        | V <sup>5+</sup> |                                  |
| 0.1 V             | 0.781                                                  | 0.219           | 0.28                             |
| 2.2 V             | 0.287                                                  | 0.713           | 2.48                             |
| As-annealed       | 0.361                                                  | 0.639           | 1.77                             |

Table S1 shows that the molar ratio of V<sup>5+</sup>/V<sup>4+</sup> in the reduced (0.1V-discharged) PEDOT@V<sub>2</sub>O<sub>5</sub> electrode is 0.28, and 2.48 in the oxidized (2.2V-charged) PEDOT@V<sub>2</sub>O<sub>5</sub>. These results indicate that the color switching of Zn-PEDOT@V<sub>2</sub>O<sub>5</sub> electrochromic systems is attributed to the reversible V valence change between V<sup>5+</sup>/V<sup>4+</sup>.

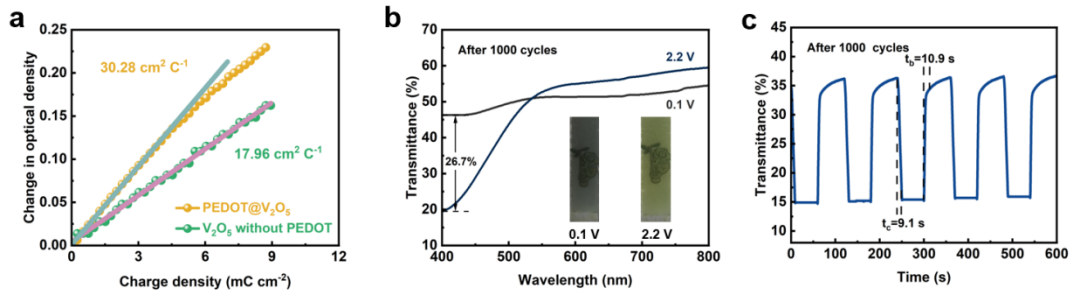

**Fig. S6.** The performance of PEDOT@ $\text{V}_2\text{O}_5$  electrode. **a** Coloration efficiency compared to the  $\text{V}_2\text{O}_5$  electrode. **b** T% spectra after 1000 CV cycles. **c** The bleaching/coloration times after 1000 CV cycles.

**Table S2. Comparison of V<sub>2</sub>O<sub>5</sub> performance in different organic electrolytes.**

| electrolytes                             | Electrode material                  | Bleaching/Coloration time(s) | Transmittance modulation | CV cycles         | Refs      |
|------------------------------------------|-------------------------------------|------------------------------|--------------------------|-------------------|-----------|
| 1M Zn <sup>2+</sup> /Li <sup>+</sup> -PC | PEDOT@V <sub>2</sub> O <sub>5</sub> | 10.9 s/9.1 s                 | 27.1%@400 nm             | 85.6%/1000 cycles | This work |
| 1M Li <sup>+</sup> -PC                   | a-V <sub>2</sub> O <sub>5</sub>     | 21.2 s/17.1 s                | 38%@750 nm               | 70%/1000 cycles   | [3]       |
| 0.3M LiTFSI-BMITFSI                      | V <sub>2</sub> O <sub>5</sub>       | 120 s/120 s                  | 20%@630 nm               | 98%/50 cycles     | [4]       |
| 1M Li <sup>+</sup> -PC                   | TaVO <sub>x</sub>                   | 30s/30s                      | 12%@550 nm               | 99%/100 cycles    | [5]       |
| 1M Li <sup>+</sup> -PC                   | Ti-V <sub>2</sub> O <sub>5</sub>    | 20 s/56 s                    | 28%@500 nm               | 45%/100 cycles    | [6]       |
| 1M Li <sup>+</sup> -PC                   | VMC                                 | 3.6 s/5.6 s                  | 18.95%@664 nm            | 53%/500 cycles    | [7]       |

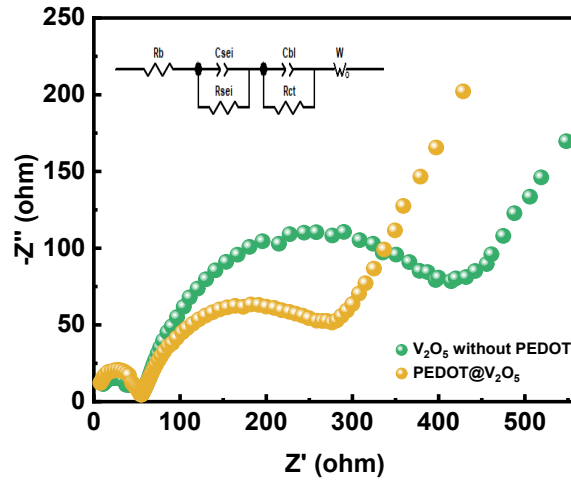

Fig. S7 Nyquist plots of  $V_2O_5$  and PEDOT@ $V_2O_5$ .

The semicircle in the high-frequency region corresponds to the resistance of the Solid Electrolyte Interphase (SEI) film ( $R_{SEI}$ ), the semicircle in the middle-frequency region indicates the charge transfer resistance ( $R_{CT}$ ), and the oblique line in the low-frequency region represents the Warburg impedance.

#### Notes and references

- [1]. Q. Su, C. K. Huang, Y. Wang, Y. C. Fan, B. A. Lu, W. Lan, Y. Y. Wang and X. Q. Liu, *Journal of Alloys and Compounds*, 2009, **475**, 518-523.
- [2]. S. Gupta and B. Evans, *Journal of Materials Science*, 2023, **58**, 11198-11217.
- [3]. J Wang, W Zhao, B Tam, H Zhang, Y Zhou, L Yong, W Cheng, *Chemical Engineering Journal*, 2023, **452**, 4.
- [4]. I. Mjejri, L.M. Mancieru, M. Gaudon, A. Rougier, F. Sediri, *Solid State Ionics*, 2016, **292**,8-14.
- [5]. G Mario, R Thomas, B Martin, P Angelika, *Journal of Materials Science*, 2022, **57**, 12810–12823.
- [6]. G Salek, B Bellanger, I Mjejri, M Gaudon, I Rougier, *Inorganic Chemistry*, 2016, **55**, 9838-9847
- [7]. S Sun, S Cui, F Wang, M Gao, W Wie, J Dong, X Xia, Q Zhu, Ji Zhang, *ACS Applied Electronic Materials*, 2022, **4**, 4724-4732
